# Supplementary material for: Sucrose Metabolism and Transport in Grapevines, with Emphasis on Berries and Leaves, and Insights Gained from a Cross-Species Comparison
Source: MDPI journal article supplement (doi:10.3390/ijms22157794), 2021-07-21
Supplement: s1 [file s1]

**Supplementary Table S1.** Genes encoding sugar transporters and those involved in sugar metabolism identified in the grape genome. In the table are reported the ID associated with the transcript name for the version 12X (at EMBL FN597015-FN597047, release 102), and version 12XC3 ([296]: to make easier the identification of genes mentioned in Figure 1 (see references in the last column). For each gene the Vitis annotation (12X version), and best hits against the Arabidopsis genome sequences (TAIR, <https://www.arabidopsis.org/Blast/>) are also reported.

| Gene ID            | transcriptName 12X | Transcript Name 12xC3 | Vitis annotation                                                                  | Best-hit-arabi-name | arabi-symbol            | arabi-defline\                         | Reference |
|--------------------|--------------------|-----------------------|-----------------------------------------------------------------------------------|---------------------|-------------------------|----------------------------------------|-----------|
| <i>VvHT1</i>       | GSVIVT01003181001  | Vitvi10g00358         |                                                                                   | AT1G11260.1         | ATSTP1,STP1             | sugar transporter 1\                   | [74,75]   |
| <i>VvHT2</i>       | GSVIVT01009024001  | Vitvi18g00397         | SUGAR TRANSPORT PROTEIN 5                                                         | AT1G34580.1         |                         | Major facilitator superfamily protein\ | [74]      |
| <i>VvHT3</i>       | GSVIVT01001036001  | Vitvi11g00611         | SUGAR TRANSPORT PROTEIN 7                                                         | AT4G02050.1         | STP7                    | sugar transporter protein 7\           | [74]      |
| <i>VvSUC11</i>     | GSVIVT01009254001  | Vitvi18g00584         | solute carrier family 45, member 1/2/4 (SLC45A1_2_4)                              | AT1G09960.1         | ATSUC4,ATSUT4,SUC4,SUT4 | sucrose transporter 4\                 | [74,120]  |
| <i>VvSUC12</i>     | GSVIVT01020031001  | Vitvi01g00959         | SUCROSE TRANSPORT PROTEIN SUC3                                                    | AT2G02860.1         | ATSUC3,ATSUT2,SUC3,SUT2 | sucrose transporter 2\                 | [74,120]  |
| <i>VvSUC27</i>     | GSVIVT01034886001  | Vitvi18g01315         | SUCROSE TRANSPORT PROTEIN SUC1-RELATED                                            | AT1G71890.1         | ATSUC5,SUC5             | Major facilitator superfamily protein\ | [74,120]  |
| <i>VvTM1/VvHT6</i> | GSVIVT01013414001  | Vitvi18g00056         | Sugar (and other) transporter (Sugar_tr) // Major Facilitator Superfamily (MFS_1) | AT4G35300.4         | TMT2                    | tonoplast monosaccharide transporter2\ | [74]      |

|                  |                   |               |                                                                 |             |                             |                                               |         |
|------------------|-------------------|---------------|-----------------------------------------------------------------|-------------|-----------------------------|-----------------------------------------------|---------|
| <i>VvMT2</i>     | GSVIVT01023868001 | Vitvi03g00247 | MONOSACCHARID<br>E-SENSING<br>PROTEIN                           | AT4G35300.1 | TMT2                        | tonoplast<br>monosaccharide<br>transporter2\  | [2,74]  |
| <i>VvSWEET10</i> | GSVIVT01008595001 | Vitvi17g00070 | BIDIRECTIONAL<br>SUGAR<br>TRANSPORTER<br>SWEET10                | AT5G50790.1 |                             | Nodulin MtN3<br>family protein\               | [76,78] |
| <i>VsSWEET15</i> | GSVIVT01000938001 | Vitvi01g01719 | BIDIRECTIONAL<br>SUGAR<br>TRANSPORTER<br>SWEET10                | AT5G13170.1 | SAG29                       | senescence-<br>associated gene 29             | [76,78] |
| <i>VvSuSy3</i>   | GSVIVT01028043001 | Vitvi07g00353 | SUCROSE<br>SYNTHASE 2                                           | AT4G02280.1 | ATSUS3,SUS3                 | sucrose synthase 3\                           | [77]    |
| <i>VvSuSy4</i>   | GSVIVT01015018001 | Vitvi11g00030 | SUCROSE<br>SYNTHASE 1-<br>RELATED                               | AT3G43190.1 | ATSUS4,SUS4                 | sucrose synthase 4\                           | [77]    |
|                  |                   |               |                                                                 |             |                             |                                               |         |
| <i>SPS</i>       | GSVIVT01035882001 | Vitvi04g00508 | SF404 -<br>GLYCOSYLTRANSF<br>ERASE //<br>SUBFAMILY NOT<br>NAMED | AT5G11110.1 | ATSPS2F,KNS2<br>,SPS1,SPS2F | sucrose phosphate<br>synthase 2F\             | [77]    |
| <i>VvNI1</i>     | GSVIVT01024105001 | Vitvi03g00088 | Beta-<br>fructofuranosidase /<br>Saccharase                     | AT4G34860.2 |                             | Plant neutral<br>invertase family<br>protein\ | [77,79] |
| <i>VvNI2</i>     | GSVIVT01034944001 | Vitvi05g00164 | Alkaline and neutral<br>invertase<br>(Glyco_hydro_100)          | AT3G06500.1 |                             | Plant neutral<br>invertase family<br>protein\ | [79]    |
| <i>VvNI3</i>     | GSVIVT01031267001 | Vitvi14g00070 | Alkaline and neutral<br>invertase<br>(Glyco_hydro_100)          | AT1G56560.1 |                             | Plant neutral<br>invertase family<br>protein\ | [79]    |

|               |                   |               |                                                  |             |                      |                                         |         |
|---------------|-------------------|---------------|--------------------------------------------------|-------------|----------------------|-----------------------------------------|---------|
| <i>VvNI4</i>  | GSVIVT01031374001 | Vitvi06g01427 | Alkaline and neutral invertase (Glyco_hydro_100) | AT5G22510.1 | At-A/N-InvE,INV-E    | alkaline/neutral invertase \            | [79]    |
| <i>VvCWAI</i> | GSVIVT01016869001 | Vitvi09g00193 |                                                  | AT3G13790.2 | ATBFRUCT1,ATCWINV1   | Glycosyl hydrolases family 32 protein \ | [75,77] |
| <i>VvAI1</i>  | GSVIVT01018625001 | Vitvi06g01427 | beta-fructofuranosidase (E3.2.1.26, sacA)        | AT1G62660.1 |                      | Glycosyl hydrolases family 32 protein \ | [75,77] |
| <i>VvAI2</i>  | GSVIVT0100127200  | Vitvi02g00512 | ACID BETA-FRUCTOFURANOSIDASE 3, VACUOLAR-RELATED | AT1G12240.1 | ATBETAFRUCT4,VAC-INV | Glycosyl hydrolases family 32 protein \ | [75,77] |
